# Supplementary material for: Untangling hidden nutrient dynamics: rapid ammonium cycling and single-cell ammonium assimilation in marine plankton communities
Source: PubMed Central journal article supplement (PMC6776039; doi:10.1038/s41396-019-0386-z), 2019-03-25
Supplement: 41396_2019_386_MOESM1_ESM.pdf [file 41396_2019_386_MOESM1_ESM.pdf]

## SUPPLEMENTARY INFORMATION

### Untangling hidden nutrient dynamics: Rapid ammonium cycling and single-cell ammonium assimilation in marine plankton communities

Isabell Klawonn, Stefano Bonaglia, Martin J. Whitehouse, Sten Littmann, Daniela Tienken, Marcel M.M. Kuypers, Volker Brüchert, Helle Ploug

#### Text S1 Material and Methods

##### *Calculations for bulk ammonium cycling, N<sub>2</sub>- and C-fixation*

Rates  $\rho$  of bulk N<sub>2</sub>-fixation, C-fixation and net ammonium assimilation were calculated following reference [1], as

$$\rho_{\text{N}_2\text{-fixation}} = \frac{A_{\text{sample}}^{\text{PN}} - A_{\text{control}}^{\text{PN}}}{A_{\text{N}_2} - A_{\text{control}}^{\text{PN}}} \times \frac{[\text{PN}]}{t} \quad (1)$$

$$\rho_{\text{C-fixation}} = \frac{A_{\text{sample}}^{\text{PC}} - A_{\text{control}}^{\text{PC}}}{A_{\text{DIC}} - A_{\text{control}}^{\text{PC}}} \times \frac{[\text{PC}]}{t} \quad (2)$$

$$\rho_{\text{NH}_4^+\text{ assimilation}}^{\text{net}} = \frac{A_{\text{sample}}^{\text{PN}} - A_{\text{control}}^{\text{PN}}}{R} \times \frac{[\text{PN}]}{t} \quad (3)$$

where  $A$  is the isotope atom% in the dissolved N<sub>2</sub> pool ( $A_{\text{N}_2}$ ), DIC pool ( $A_{\text{DIC}}$ ) or particulate material ( $A_{\text{PN}}$ ,  $A_{\text{PC}}$ );  $\text{PN}$  and  $\text{PC}$  are the amounts of particulate N and C, respectively, and  $R$  the <sup>15</sup>N-ammonium atom% excess in the dissolved ammonium pool.  $R$  was calculated by accounting for the exponential decrease in <sup>15</sup>N-ammonium concentrations due to concurrent ammonium assimilation and regeneration following references [2].

20 
$$R = \frac{R_0}{kt} [1 - \exp(-kt)] \quad (4)$$

21 where  $R_0$  is the  $^{15}\text{N}$ -ammonium atom% excess at time zero,  $t$  the incubation time and  $k$  a constant  
 22 determined from the exponential decrease of  $R$  over time:

23 
$$R = R_0 \times \exp^{-kt} \quad (5)$$

24 Besides ammonium assimilation rates (accounting for  $^{15}\text{N}$ -PON on GF/F filters, equation 3), we  
 25 also calculated gross consumption rates which accounted for the actual  $^{15}\text{N}$ -ammonium decrease  
 26 in the water

27 
$$\rho_{\text{NH}_4^+ \text{consumption}}^{\text{gross}} = \frac{(C_0 - C_t)}{(R \times t)} \quad (6)$$

28 where  $C_t$  and  $C_0$  are the  $^{15}\text{N}$ -ammonium concentrations measured at time zero and time  $t$ .  
 29 Production rates were calculated differently for incubations during which ammonium  
 30 concentrations either remained stable (equation 7) or changed significantly over time (equation 8).

31 
$$\rho_{\text{NH}_4^+ \text{production}}^{\text{gross}} = k \times P \quad (7)$$

32 
$$\rho_{\text{NH}_4^+ \text{production}}^{\text{gross}} = \rho_{\text{NH}_4^+ \text{consumption}}^{\text{gross}} + \left( \frac{P_t - P_0}{t} \right) \quad (8)$$

33 where  $P$  is the mean ammonium concentration (initial  $^{14}\text{N}$ - plus added  $^{15}\text{N}$ -ammonium) during  
 34 incubations and  $(P_t - P_0)$  the difference in ammonium concentrations between time points.  
 35 Ammonium production was specified to derive either from ammonium regeneration or from new  
 36 production as ammonium release during  $\text{N}_2$ -fixation. The latter was assumed to account for half of  
 37 the  $\text{N}_2$ -fixation rates, as shown for cells sampled concurrently with the ones herein [3] and during  
 38 previous years [4, 5]. Parts of the new N might have also been released as DON (see discussion in  
 39 main text). Rates were calculated for the initial  $\leq 2$  h of each incubation since  $^{15}\text{N}$ -ammonium  
 40 concentrations decreased rapidly, often getting depleted before the final sampling point (especially

41 in August). The turnover time of ammonium was defined as  $P_{0-15N}$  (initial ammonium concentration  
42 before  $^{15}\text{N}$ -ammonium addition) divided by gross production rates.

43

#### 44 *Calculations of single-cell assimilation rates*

45 Single-cell N-specific ammonium assimilation and C-specific C-fixation rates after SIMS analyses  
46 were calculated as

$$47 \quad \text{N-specific } \text{NH}_4^+ \text{ assimilation (h}^{-1}\text{)} = \frac{A_{\text{sample cell}} - A_{\text{control cell}}}{R \times t} \quad (9)$$

$$48 \quad \text{C-specific C-fixation (h}^{-1}\text{)} = \frac{A_{\text{sample cell}} - A_{\text{control cell}}}{(A_{\text{DIC sample}} - A_{\text{DIC control}}) \times t} \quad (10)$$

49 where  $A$  is the  $^{15}\text{N}$ - and  $^{13}\text{C}$ -atom%, respectively.

50 Note that single-cell rates may be closer to gross rather than net activities, due to our short  
51 incubation times and the coupling of assimilation and release processes.

52

53 Due to the  $^{15}\text{N}$ -ammonium additions, bulk concentrations increased by 5–46%, potentially  
54 stimulating ammonium assimilation. We therefore corrected all rates by accounting for ammonium  
55 uptake kinetics, as done previously [6, 7]:

$$56 \quad \rho_{\text{NH}_4^+ \text{ assimilation}}^{\text{corrected}} = \frac{\rho_{\text{NH}_4^+ \text{ assimilation}}^{\text{measured}}}{P_0 / (K_s + P_0) \times (K_s + P_{0-15N}) / P_{0-15N}} \quad (11)$$

57 where  $P_{0-15N}$  and  $P_0$  are the ambient ammonium concentrations before and after  $^{15}\text{N}$ -ammonium  
58 additions, respectively, and  $K_s$  is the half-saturation constant which we assumed to be 50 nM, in  
59 the upper range of literature values of 15–60 nM [7-9]. The resulting overestimations were 8% for  
60 June incubations (after  $20 \pm 5\%$   $^{15}\text{N}$ -ammonium additions,  $n=36$ ), 0.4% for the morning incubations

61 in August 2013 ( $5.0 \pm 0.2\%$   $^{15}\text{N}$ -additions,  $n=9$ ) and 39% for the remaining incubations in August  
62 ( $46 \pm 6\%$   $^{15}\text{N}$ -additions,  $n=27$ ). All ammonium consumption, production and assimilation rates  
63 (including bulk and single-cell data) were corrected according to those percent overestimations.

64

65 Ammonium fluxes constrained by diffusion-limited ammonium supply to single *Synechococcus*  
66 cells were calculated from the analytical solutions of diffusion to a sphere [10]

67 
$$Q_{\max} = 4\pi D r_0 (C_{\infty} - C_0) \quad (12)$$

68 where  $Q_{\max}$  is the potential ammonium uptake rate ( $\text{nmol s}^{-1}$ ) of a cell with the equivalent spherical  
69 radius  $r_0$ ,  $D$  the ammonium diffusion coefficient in water ( $1.57 \times 10^{-5} \text{ cm}^2 \text{ s}^{-1}$  at  $16^\circ\text{C}$  and salinity  
70 of 6) [11],  $C_0$  the ammonium concentration at the cell surface (assumed to be zero) and  $C_{\infty}$  the  
71 concentration in the ambient water. Maximum ammonium fluxes to *Chaetoceros* were calculated  
72 for cylindrical cell-chains [12]

73 
$$Q_{\max} = \left[ 8 + 6.95 \left( \frac{l}{d} \right)^{0.76} \right] r_0 \times D \times (C_{\infty} - C_0) \quad (13)$$

74 where  $l$  is the length and  $d$  the diameter of diatom chains with at least 2 and up to 17 cells (as  
75 observed under the microscope).

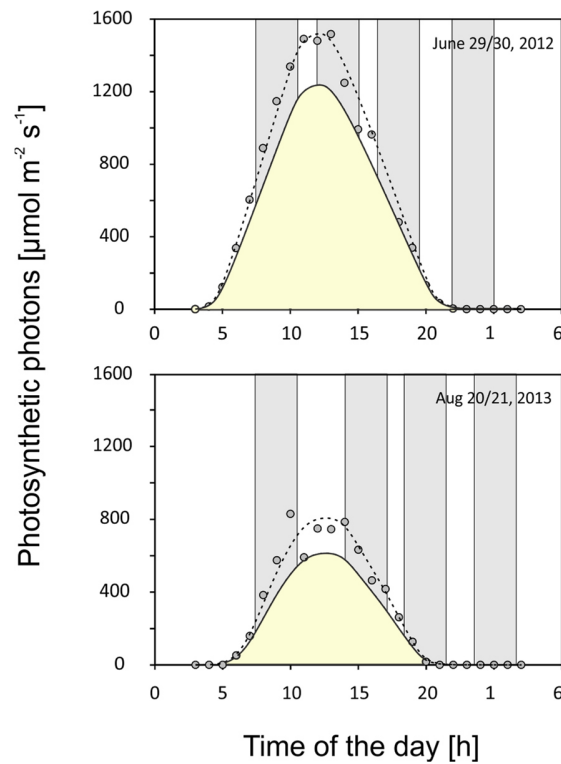

77

78 **Figure S1.** Solar irradiance during incubations in June 2012 and August 2013. Light intensities in  
 79 air are shown as grey circles/dashed outline, while light at 0.5 m water depth is highlighted in  
 80 yellow. A light attenuation coefficient of 0.37 was applied. Incubation periods are highlighted as  
 81 grey-shaded bars. Data derive from the Swedish Meteorological and Hydrological Institute (SMHI)  
 82 and were produced with support from the Swedish Radiation Protection Authority and the Swedish  
 83 Environmental Agency.

84

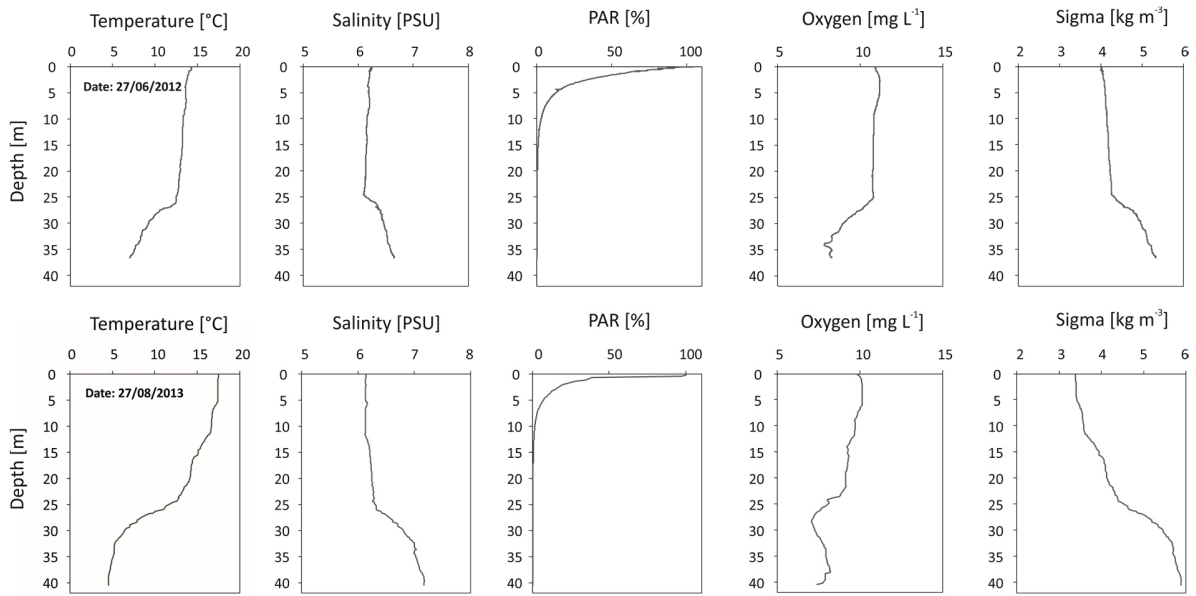

85

86

87 **Figure S2a.** CTD profiles recorded at station B1 on 27/06/2012 (upper panel) and 27/08/2013

88 (lower panel). PAR - Photosynthetically active radiation

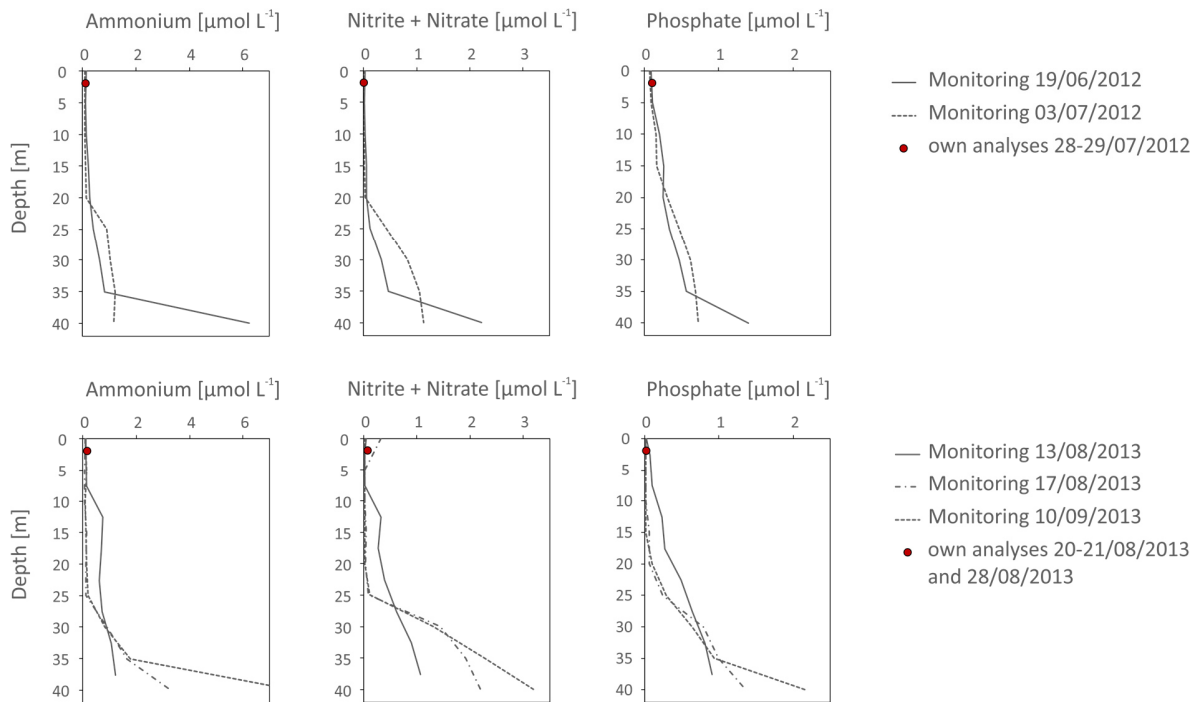

89

90 **Figure S2b.** Nutrient concentration profiles at Station B1, recorded by the Swedish National  
 91 Marine Monitoring Program (SNMMP), at dates which coincided closest with our own water  
 92 sampling. Nutrient data from the actual incubation water (sampled at 1–3 m depth, red data points)  
 93 are plotted in comparison to the profiles (black lines). Monitoring data were extracted from the  
 94 public database available online

95 (<http://www.smhi.se/klimatdata/oceanografi/havsmiljodata/marina-miljoovervakningsdata>).

96

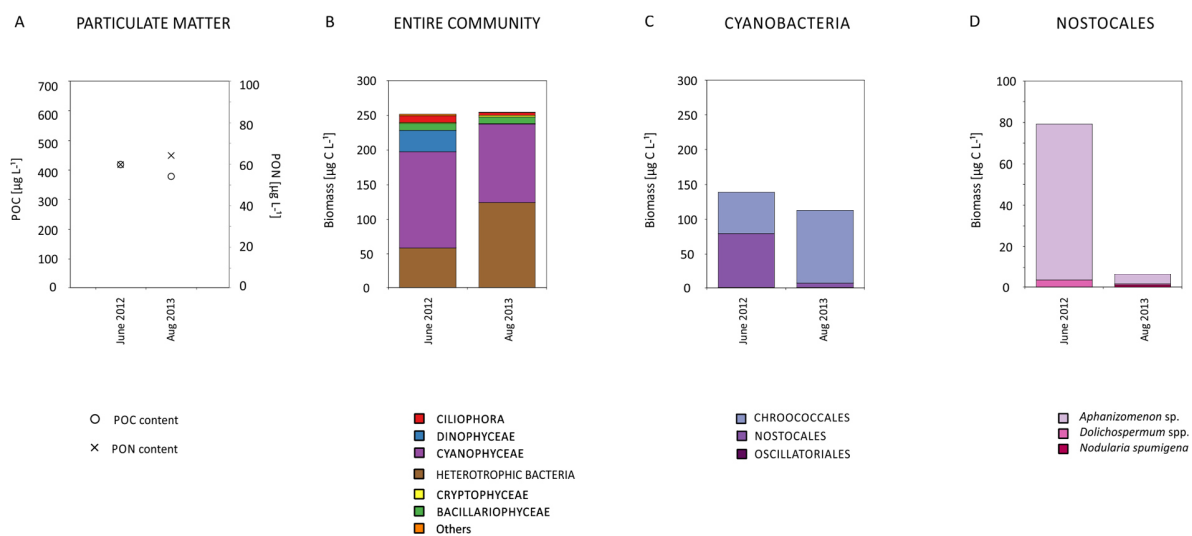

97

98 **Figure S3.** Particulate organic carbon and nitrogen (POC and PON measured on GF/F filters), as  
 99 well as C-biomass and community composition of the bacterio- and phytoplankton during  
 100 incubations. The bacterio- and phytoplankton biomass (ca 250  $\mu\text{g C L}^{-1}$  during both samplings)  
 101 comprised mainly Cyanobacteria (45–56% of the C-biomass), heterotrophic bacteria (23–49%) and  
 102 to a lesser extent Dinophyta (0.3–12%) and Bacillariophyceae (4%), Ciliophora (1–4%, including  
 103 only *Mesodinium rubrum* as autotrophic ciliate), Cryptophyceae (0.4–0.9%) and *others* (<1%,  
 104 Haptophyceae, Zoomastigophora, Chlorophyta).



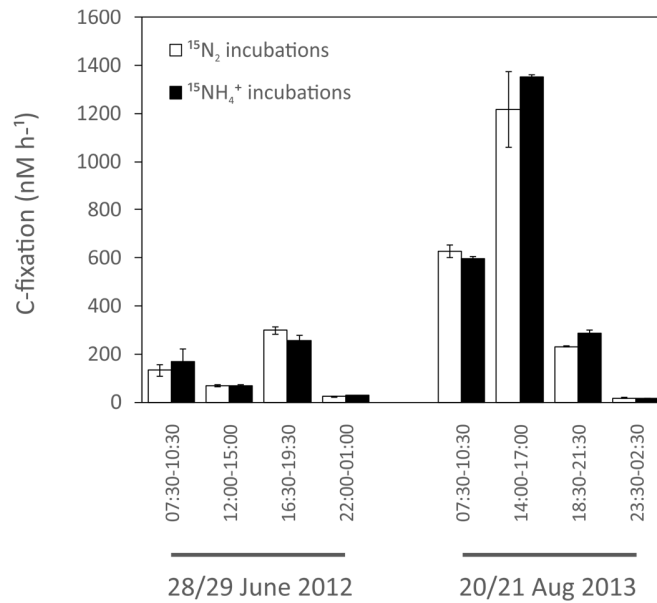

105

106 **Figure S4.** Carbon fixation rates measured during June 2012 and August 2013 in parallel incubated  
 107 bottles enriched with  $^{15}\text{N}_2$ -gas or  $^{15}\text{N}$ -ammonium. Similar rates in both incubations indicated no  
 108 stimulation of C-fixation due to ammonium additions. Shown are average  $\pm$  stdev ( $n=3$ ).

109 **Table S1.** Dimensions and C-/N-contents of the analysed phyto- and bacterioplankton. The cellular  
 110 biovolume and biomass of the various plankton groups were calculated *sensu* [13, 14] and the  
 111 HELCOM guidelines used within the Baltic Sea monitoring program [15, 16]. ESD – Equivalent  
 112 spherical diameter

113

|                                                                | Cell size<br>( $\mu\text{m}$ ) |      |      | ESD<br>( $\mu\text{m}$ ) | Biovolume<br>( $\mu\text{m}^3$ ) | N-content<br>( $\mu\text{mol N cell}^{-1}$ ) | C-content<br>( $\mu\text{mol C cell}^{-1}$ ) | Reference<br>Calculation of<br>C and N<br>content |
|----------------------------------------------------------------|--------------------------------|------|------|--------------------------|----------------------------------|----------------------------------------------|----------------------------------------------|---------------------------------------------------|
|                                                                | d1                             | h    | d2   |                          |                                  |                                              |                                              |                                                   |
| <i>Aphanizomenon</i>                                           | 4.3                            | 8.4  |      | 6.2                      | 122.0                            | 0.34 $\pm$ 0.07                              | 2.13 $\pm$ 0.41                              | [13]                                              |
| <i>N. spumigena</i>                                            | 10.4                           | 3.5  |      | 8.3                      | 297.3                            | 0.82 $\pm$ 0.17                              | 5.19 $\pm$ 1.09                              | [13]                                              |
| <i>Dolichospermum</i>                                          | 5.3                            |      |      | 5.3                      | 78.0                             | 0.22 $\pm$ 0.08                              | 1.36 $\pm$ 0.51                              | [13]                                              |
| <i>Pseudanabaena</i>                                           | 1.5                            | 6.9  |      | 2.9                      | 12.2                             | 0.029 $\pm$ 0.002                            | 0.19 $\pm$ 0.02                              | [16]                                              |
| Colonial picocyanobacteria<br><i>Aphanocapsa</i>               | 1.5                            |      |      | 1.5                      | 1.8                              | 0.009 $\pm$ 0.002                            | 0.059 $\pm$ 0.016                            | [14]                                              |
| Colonial picocyanobacteria<br><i>Cyanodictyon</i>              | 1.0                            | 1.2  |      | 1.2                      | 0.9                              | 0.005 $\pm$ 0.001                            | 0.034 $\pm$ 0.010                            | [14]                                              |
| Colonial picocyanobacteria <i>A.</i><br><i>paralleliformis</i> | 0.9                            | 1.8  |      | 1.3                      | 1.1                              | 0.006 $\pm$ 0.002                            | 0.041 $\pm$ 0.011                            | [14]                                              |
| Unicellular picocyanobacteria<br><i>Synechococcus</i>          | 0.7                            | 1.1  |      | 0.9                      | 0.4                              | 0.003 $\pm$ 0.001                            | 0.017 $\pm$ 0.004                            | [14]                                              |
| Heterotrophic bacteria                                         | 0.45                           | 0.60 |      | 0.52                     | 0.072                            | 0.0004 $\pm$ 0.0001                          | 0.0017 $\pm$ 0.0003                          | [16]                                              |
| Diatom <i>Chaetoceros</i>                                      | 13.0                           | 5.1  | 6.6  | 8.7                      | 344                              | 0.4 $\pm$ 0.1                                | 2.7 $\pm$ 0.9                                | [16]                                              |
| Dinoflagellates <i>Dinophysis</i>                              | 34.0                           | 48.0 | 24.3 | 34.1                     | 20753                            | 30.0 $\pm$ 4.8                               | 198.9 $\pm$ 32.1                             | [16]                                              |
| Dinoflagellates <i>Heterocapsa</i>                             | 16.5                           | 23.1 |      | 14.7                     | 1646                             | 2.8 $\pm$ 1.7                                | 18.9 $\pm$ 11.0                              | [16]                                              |

114

115 **References**

- 116 1. Montoya JP, Voss M, Kähler P, & Capone DG (1996) A simple, high-precision, high-sensitivity  
117 tracer assay for N<sub>2</sub> fixation. *Appl. Environ. Microbiol.* 62(3):986-993.
- 118 2. Glibert PM, Lipschultz F, McCarthy JJ, & Altabet MA (1982) Isotope dilution models of uptake  
119 and remineralization of ammonium by marine plankton *Limnol. Oceanogr.* 27(2)(2):639-650.
- 120 3. Klawonn I, Nahar N, Walve J, Andersson B, Olofsson M, Svedén JB *et al.* (2016) Cell-specific  
121 nitrogen- and carbon-fixation of cyanobacteria in a temperate marine system (Baltic Sea). *Environ.*  
122 *Microbiol.* 18(12):4596-4609.
- 123 4. Adam B, Klawonn I, Svedén JB, Bergkvist J, Nahar N, Walve J *et al.* (2016) N<sub>2</sub>-fixation,  
124 ammonium release and N-transfer to the microbial and classical food web within a plankton  
125 community. *ISME J.* 10(2):450-459.
- 126 5. Ploug H, Adam B, Musat N, Kalvelage T, Lavik G, Wolf-Gladrow D *et al.* (2011) Carbon, nitrogen  
127 and O<sub>2</sub> fluxes associated with the cyanobacterium *Nodularia spumigena* in the Baltic Sea. *ISME J.*  
128 5:1549–1558.
- 129 6. Rees AP, Joint I, & Donald KM (1999) Early spring bloom phytoplankton-nutrient dynamics at the  
130 Celtic Sea Shelf Edge. *Deep-Sea Res. Pt I* 46(3):483-510.
- 131 7. Raimbault P & Garcia N (2008) Evidence for efficient regenerated production and dinitrogen  
132 fixation in nitrogen-deficient waters of the South Pacific Ocean: impact on new and export  
133 production estimates. *Biogeosciences* 5(2):323-338.
- 134 8. Sahlsten E (1987) Nitrogenous nutrition in the euphotic zone of the Central North Pacific Gyre.  
135 *Mar. Biol.* 96(3):433-439.
- 136 9. Harrison WG, Harris LR, & Irwin BD (1996) The kinetics of nitrogen utilization in the oceanic  
137 mixed layer: Nitrate and ammonium interactions at nanomolar concentrations. *Limnol. Oceanogr.*  
138 41(1):16-32.
- 139 10. Sherwood TK, Pigford RL, & Wilke CR (1975) *Mass transfer* (McGraw-Hill Book Company, New  
140 York, USA).
- 141 11. Li YH & Gregory S (1974) Diffusion of ions in sea water and in deep-sea sediments. *Geochim.*  
142 *Cosmochim. Acta* 38(5):703-714.
- 143 12. Clift R, Grace JR, & Weber ME (1978) *Bubbles, drops, and particles* (Academic Press,, New York,  
144 London ) p 380.
- 145 13. Svedén JB, Adam B, Walve J, Nahar N, Musat N, Lavik G *et al.* (2015) High cell-specific rates of  
146 nitrogen and carbon fixation by the cyanobacterium *Aphanizomenon* sp. at low temperatures in the  
147 Baltic Sea. *FEMS Microbiol. Ecol.* 91(12).
- 148 14. Verity PG, Robertson CY, Tronzo CR, Andrews MG, Nelson JR, & Sieracki ME (1992)  
149 Relationships between cell volume and the carbon and nitrogen content of marine photosynthetic  
150 nanoplankton. *Limnol. Oceanogr.* 37(7):1434-1446.

- 151 15. Olenina I, Hajdu S, Edler L, Andersson A, Wasmund N, Busch S *et al.* (2006) Biovolumes and size-  
152 classes of phytoplankton in the Baltic Sea. *HELCOM Balt. Sea Environ. Proc.* 106:144.
- 153 16. HELCOM (last updated July 2017) Manual for Marine Monitoring in the COMBINE Programme  
154 of HELCOM. ([http://www.helcom.fi/action-areas/monitoring-and-assessment/manuals-and-](http://www.helcom.fi/action-areas/monitoring-and-assessment/manuals-and-guidelines/combine-manual)  
155 [guidelines/combine-manual](http://www.helcom.fi/action-areas/monitoring-and-assessment/manuals-and-guidelines/combine-manual)).
- 156
